# Supplementary material
Source: PubMed Central journal article supplement (PMC3308461)
Supplement: pri-29-198_s001.pdf [file pri-29-198_s001.pdf]

*Supplementary material for Huibers L, Smits M, Renaud V, Giesen P & Wensing M. Safety of telephone triage in out-of-hours care: A systematic review. Scand J Prim Health Care, 2011;29:198–209.*

Supplementary Table I. Identified studies (n = 34).

| First author | Year; place | Design                                              | Setting                                                                 | Number<br>(unselected/high-risk) | Outcome measured<br>(primary or<br>secondary)             |
|--------------|-------------|-----------------------------------------------------|-------------------------------------------------------------------------|----------------------------------|-----------------------------------------------------------|
| Verdile      | 1989        | Simulated patient<br>(1 case high-risk)             | ED                                                                      | 46                               | Appropriateness of<br>advice/referral                     |
| O'Brien      | 1990        | Simulated patient<br>(1 case high-risk)             | Urgent care centres                                                     | 100                              | Appropriateness of<br>advice/referral                     |
| Isaacman     | 1992        | Simulated patient<br>(1 case high-risk)             | ED                                                                      | 61                               | Appropriateness of<br>advice/referral                     |
| Yanovski     | 1992        | Simulated patient<br>(3 cases, 1 case<br>high-risk) | Pediatric and family<br>medicine (private<br>practices and<br>hospital) | 117                              | Appropriateness of<br>advice/referral                     |
| Evans        | 1993        | Simulated patient<br>(3 cases, 1 case<br>high-risk) | ED                                                                      | 30                               | Appropriateness of<br>advice/referral                     |
| Egleston     | 1994        | Retrospective<br>follow-up study                    | ED                                                                      | 104                              | Appropriateness of<br>advice                              |
| Kunkler      | 1994        | Simulated patient<br>(1 case high-risk)             | ED                                                                      | 72                               | Appropriateness of<br>advice/referral                     |
| Sher         | 1994        | Follow-up study                                     | Telephone helpline                                                      | 317                              | Accuracy at follow-up                                     |
| Sramek       | 1994        | Prospective<br>follow-up study                      | Ambulance dispatch<br>centres                                           | 398/136                          | Appropriateness of<br>triage decision                     |
| Aitken       | 1995        | Simulated patient<br>(1 case high-risk)             | ED and private ED<br>clinics                                            | 36                               | Appropriateness of<br>advice/referral                     |
| Farand       | 1995        | Retrospective<br>observational<br>study             | Emergency Medical<br>Services                                           | 1,006/444                        | Appropriateness of<br>triage decision                     |
| Srinivas     | 1996        | Retrospective<br>observational<br>study             | Telephone helpline and<br>ED                                            | 300                              | Appropriateness of<br>advice                              |
| Jackson      | 1997        | Retrospective<br>observational<br>study             | Primary Care Clinic<br>and Pediatric Health<br>Information Line         | 19 vs. 50                        | Appropriateness of<br>advice                              |
| Fatovich     | 1998        | Prospective<br>observational<br>study               | ED                                                                      | 1,682                            | Appropriateness of<br>advice                              |
| Lattimer     | 1998        | Randomised<br>controlled trial                      | Primary care physician<br>cooperatives                                  | 7,308 vs. 7,184                  | Adverse events                                            |
| Thompson     | 1999        | Randomised<br>controlled trial                      | Primary care physician<br>cooperatives                                  | 100 vs. 123                      | Adverse events                                            |
| Hildebrandt  | 2003        | Retrospective<br>follow-up study                    | Primary care<br>physicians and<br>answering services                    | 119                              | Appropriateness of<br>self-triage                         |
| Kempe        | 2003        | Retrospective study                                 | After-hours call centres<br>of children's hospital                      | 1,561                            | Under-referral;<br>hospitalisation                        |
| Labarere     | 2003        | Follow-up study                                     | After-hours primary<br>care call centre                                 | 409                              | Adverse events                                            |
| Moriarty     | 2003        | Simulated patient<br>(4 cases, all<br>high-risk)    | Primary care telephone<br>triage system                                 | 85                               | Appropriateness of<br>advice/referral                     |
| Dale         | 2004        | Retrospective<br>observational<br>study             | Ambulance services                                                      | 239                              | Appropriateness of<br>triage decision                     |
| Scarfone     | 2004        | Retrospective<br>observational<br>cohort study      | After-hours call centre<br>of a tertiary care<br>hospital               | 927/178                          | Appropriateness of<br>advice/referral;<br>hospitalisation |

(Continued)

Supplementary Table I. (Continued).

| First author | Year; place | Design                                                                | Setting                                                               | Number<br>(unselected/high-risk) | Outcome measured<br>(primary or<br>secondary)             |
|--------------|-------------|-----------------------------------------------------------------------|-----------------------------------------------------------------------|----------------------------------|-----------------------------------------------------------|
| Sprivulis    | 2004        | Comparative study with concurrent controls                            | Health Direct and ED                                                  | 842                              | Appropriateness of advice/referral                        |
| St George    | 2005        | Retrospective observational cohort study                              | Healthline                                                            | 90                               | Appropriateness of advice                                 |
| Deakin       | 2006        | Retrospective observational cohort study                              | Ambulance service call centre                                         | 263                              | Appropriateness of triage decision                        |
| Hildebrandt  | 2006        | Retrospective observational study                                     | Private family medicine call handling                                 | 119                              | Adverse events of self-triage                             |
| Kempe        | 2006        | Retrospective follow-up study                                         | Pediatric after-hours call centre                                     | 32,968                           | Adverse events; potential under-referral; hospitalisation |
| Stewart      | 2006        | Follow-up study                                                       | NHS Direct and ED                                                     | 3,312                            | Appropriateness of referral                               |
| Giesen       | 2007        | Cross sectional study with simulated patients (20 cases, 5 high-risk) | Primary care physician cooperatives                                   | 83                               | Appropriateness of triage decision                        |
| Hirsh        | 2007        | Retrospective follow-up study                                         | Tertiary care paediatric hospital with call centre for paediatricians | 83                               | Hospitalisation; under-referral                           |
| Killip       | 2007        | Retrospective observational study                                     | After-hours telephone service for family medicine clinic              | 63                               | Adverse events                                            |
| Derkx        | 2008        | Cross-sectional study with simulated patients (7 cases, 3 high-risk)  | Primary care physician cooperatives                                   | 153                              | Appropriateness of advice/referral                        |
| Fourny       | 2009        | Prospective observational cohort study                                | University hospital-affiliated Emergency Medical Service call centre  | 245                              | Appropriateness of triage decision; adverse events        |
| St George    | 2009        | Retrospective observational study                                     | Nurse-on-call: telephone triage line                                  | 173 189                          | Adverse events                                            |

Notes: All patients are primary care patients; patients who contact after-hours care; only design and outcome measures relevant to this review are presented, the articles often contain extra information.
